# Supplementary material for: Artichoke Leaf Extract Effectiveness on the Skin Aging Exposome: Efficacy and Safety Results of a Split-Face Study
Source: MDPI journal article supplement (doi:10.3390/cosmetics11030069), 2024-05-03
Supplement: s1 [file s1]

## **SUPPLEMENTARY INFORMATION**

### **The Artichoke Leaf Extract Effectiveness on Skin Aging Expo-some: Efficacy and Safety Results of a Split-Face Study**

Gloria Roveda, Enza Cestone, Francesca De Gennaro, Andrea Poggi, Violetta Insolita, Vincenzo Zaccaria and Vincenzo Nobile

**Supplementary Table S1.** Inclusion and exclusion criteria.

| No. | Inclusion criteria                                                                                                                                                                                       |
|-----|----------------------------------------------------------------------------------------------------------------------------------------------------------------------------------------------------------|
| 01  | Healthy female subjects                                                                                                                                                                                  |
| 02  | Subjects aged between 40 and 65 years old                                                                                                                                                                |
| 03  | Subjects showing chrono/photo aging, dull skin and who perform work outdoor (for a time ranging from 4 to 8 hours).                                                                                      |
| 04  | Subjects registered with National Health Service (NHS)                                                                                                                                                   |
| 05  | Subjects certifying the truthfulness of the personal data disclosed to the investigator                                                                                                                  |
| 06  | Subjects able to understand the language used in the investigation center and the information given by the investigator                                                                                  |
| 07  | Subjects able to respect the instructions given by the investigator as well as able to respect the study constraints and specific requirements                                                           |
| 08  | The pharmacological therapy (except for the pharmacological therapy in the non-inclusion criteria) should be stable for at least one month without any changes expected or planned during the study      |
| 09  | Commitment not to change the daily routine or the lifestyle                                                                                                                                              |
| 10  | Subjects informed about the test procedures and who have signed a consent form.                                                                                                                          |
| No. | Exclusion criteria                                                                                                                                                                                       |
| 01  | Subjects who do not meet the inclusion criteria                                                                                                                                                          |
| 02  | Subjects with acute or chronic diseases able to interfere with the outcome of the study or that are considered dangerous for the subject or incompatible with the study requirements                     |
| 03  | Subjects participating or planning to participate in other clinical trials                                                                                                                               |
| 04  | Subjects deprived of freedom by administrative or legal decision or under guardianship                                                                                                                   |
| 05  | Subjects not able to be contacted in case of emergency                                                                                                                                                   |
| 06  | Subjects admitted to a health or social facility                                                                                                                                                         |
| 07  | Subjects planning a hospitalisation during the study                                                                                                                                                     |
| 08  | Subjects who participated in a similar study without respecting an adequate washout period                                                                                                               |
| 09  | Subjects having an acute, chronic or progressive illness liable to interfere with the study data or considered by the Investigator hazardous for the subject or incompatible with the study requirements |
| 10  | Subjects under pharmacological treatments that are considered incompatible with the study requirement by the investigator                                                                                |
| 11  | Subjects having a skin disease or condition liable to interfere with the study data or considered by the Investigator hazardous for the subject or incompatible with the study requirements              |
| 12  | Subjects under pharmacological treatments that are considered incompatible with the study requirement by the investigator                                                                                |
| 13  | Subjects that have shown allergies or sensitivity to cosmetic products, drugs, patch or medical devices                                                                                                  |
| 14  | Subject breastfeeding, pregnant or not willing to take necessary precautions to avoid pregnancy during the study (for the women of childbearing potential).                                              |

Supplementary Figure S1. Skin stripping technique.

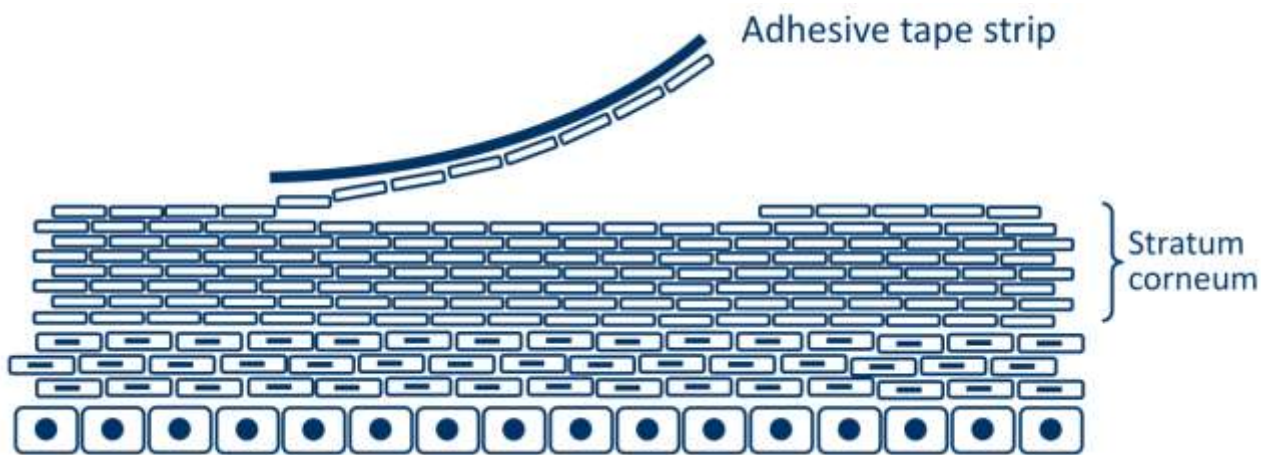

**Supplementary Table S2.** Self-assessment questionnaire.

| No. | Item                                                                                  | Completely agree         | Agree                    | Disagree                 | Completely disagree      |
|-----|---------------------------------------------------------------------------------------|--------------------------|--------------------------|--------------------------|--------------------------|
| 01  | The complexion is more radiant (less dull)                                            | <input type="checkbox"/> | <input type="checkbox"/> | <input type="checkbox"/> | <input type="checkbox"/> |
| 02  | The skin appears smoother                                                             | <input type="checkbox"/> | <input type="checkbox"/> | <input type="checkbox"/> | <input type="checkbox"/> |
| 03  | The product improves skin texture (reduction of wrinkles' depth and pores visibility) | <input type="checkbox"/> | <input type="checkbox"/> | <input type="checkbox"/> | <input type="checkbox"/> |
| 04  | The skin tone is improved (less grey)                                                 | <input type="checkbox"/> | <input type="checkbox"/> | <input type="checkbox"/> | <input type="checkbox"/> |
| 05  | The complexion is more even                                                           | <input type="checkbox"/> | <input type="checkbox"/> | <input type="checkbox"/> | <input type="checkbox"/> |
| 06  | The skin shows a healthier look                                                       | <input type="checkbox"/> | <input type="checkbox"/> | <input type="checkbox"/> | <input type="checkbox"/> |
| No. | Item                                                                                  | Very satisfied           | Satisfied                | Unsatisfied              | Very unsatisfied         |
| 07  | Are you satisfied with the results obtained with the tested product?                  | <input type="checkbox"/> | <input type="checkbox"/> | <input type="checkbox"/> | <input type="checkbox"/> |
| No. | Item                                                                                  | Yes                      | No                       |                          |                          |
| 08  | Would you suggest the use?                                                            | <input type="checkbox"/> | <input type="checkbox"/> |                          |                          |
| 09  | Are you going to continue the use?                                                    | <input type="checkbox"/> | <input type="checkbox"/> |                          |                          |
| 10  | Is the product well tolerated?                                                        | <input type="checkbox"/> | <input type="checkbox"/> |                          |                          |
